# Supplementary material for: Identifying the Potential of Old and Rustic Pig Breeds: Basque Black Pied for Crafting High-Quality Cured Food Products
Source: MDPI journal article supplement (doi:10.3390/gastronomy2010003), 2024-03-06

**Supplementary Materials:**

Figure S1: Chorizo type “sarta” loaned by Maskarada

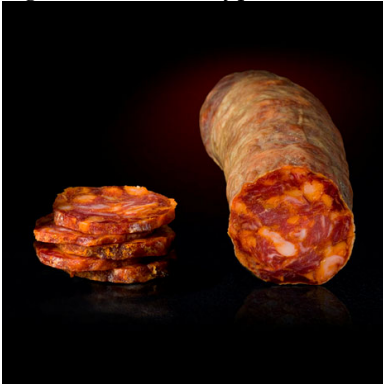

Figure S2: Chorizo type “vela” loaned by Maskarada

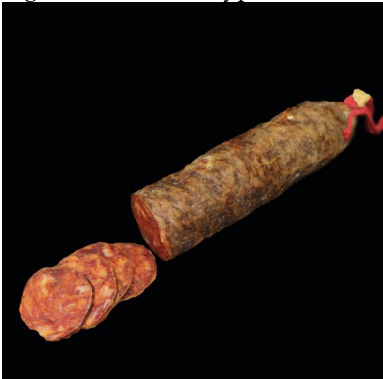

Figure S3: Ration of slices of BBP breed pig ready to eat

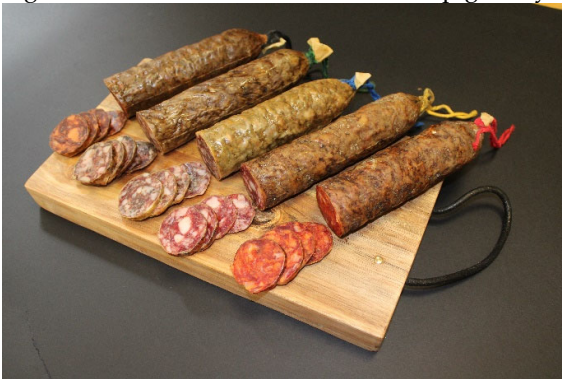

Supplement: s1 [file s1]
